# Supplementary material for: Hydrochar Application Improves Growth and Intrinsic Water Use Efficiency of Populus alba, Especially during Hot Season
Source: MDPI journal article supplement (doi:10.3390/f14040658), 2023-03-23
Supplement: s1 [file s1]

### Supplementary Materials:

**Table S1.** Mean values ( $\pm$  standard deviations, n=3) of carbon (C), hydrogen (H), nitrogen (N), oxygen (O) and ash contents and C/N ratio of each feedstock (sewage sludge and *Cynara cardunculus* residuals) and hydrochar derived from them (respectively, Hs and Hc).

|                     | Feedstock           |                       | Hydrochar          |                    |
|---------------------|---------------------|-----------------------|--------------------|--------------------|
|                     | Sewage sludge       | <i>C. cardunculus</i> | Hs                 | Hc                 |
| <b>C (% d.w.)</b>   | 33.2 ( $\pm$ 0.09)  | 42.4 ( $\pm$ 0.10)    | 30.6 ( $\pm$ 1.97) | 61.8 ( $\pm$ 1.25) |
| <b>H (% d.w.)</b>   | 6.23 ( $\pm$ 0.14)  | 6.33 ( $\pm$ 0.71)    | 5.22 ( $\pm$ 0.20) | 6.15 ( $\pm$ 0.28) |
| <b>N (% d.w.)</b>   | 1.73 ( $\pm$ 0.03)  | 0.67 ( $\pm$ 0.05)    | 0.79 ( $\pm$ 0.06) | 1.08 ( $\pm$ 0.04) |
| <b>O (% d.w.)</b>   | 13.27 ( $\pm$ 0.81) | 42.84 ( $\pm$ 1.75)   | 4.25 ( $\pm$ 0.65) | 12.7 ( $\pm$ 1.76) |
| <b>Ash (% d.w.)</b> | 45.6 ( $\pm$ 0.31)  | 7.74 ( $\pm$ 0.38)    | 59.2 ( $\pm$ 2.49) | 18.3 ( $\pm$ 3.33) |
| <b>C/N</b>          | 19.2 ( $\pm$ 0.40)  | 63.7 ( $\pm$ 6.51)    | 38.7 ( $\pm$ 0.65) | 57.3 ( $\pm$ 0.98) |

**Table S2.** Average values ( $\pm$  standard deviation) of water holding capacity (WHC), bulk density (BD), porosity (Po), pH, electrical conductivity (EC), cation exchange capacity (CEC), organic C content ( $C_{org}$ ), total nitrogen (N) of the soil used for the experiments.

|                                               |                    |
|-----------------------------------------------|--------------------|
| <b>WHC (%)</b>                                | 41.5 ( $\pm$ 3.08) |
| <b>BD (g cm<sup>-3</sup>)</b>                 | 1.53 ( $\pm$ 0.12) |
| <b>Po (%)</b>                                 | 42.3 ( $\pm$ 4.48) |
| <b>pH</b>                                     | 5.86 ( $\pm$ 0.06) |
| <b>EC (<math>\mu</math>S cm<sup>-1</sup>)</b> | 262 ( $\pm$ 18.7)  |
| <b>CEC (cmol kg<sup>-1</sup>)</b>             | 14.4 ( $\pm$ 0.71) |
| <b>C<sub>org</sub> (g kg<sup>-1</sup>)</b>    | 29.4 ( $\pm$ 4.10) |
| <b>N (g kg<sup>-1</sup>)</b>                  | 0.19 ( $\pm$ 0.02) |
